# Supplementary material for: Identification of Anti-HIV Biomarkers of Helichrysum Species by NMR-Based Metabolomic Analysis
Source: Front Pharmacol. 2022 Jul 22;13:904231. doi: 10.3389/fphar.2022.904231 (PMC9355245; doi:10.3389/fphar.2022.904231)
Supplement: Supplementary file 2 [file DataSheet1.xlsx]

## Sheet: Helichrysum species NMR data
	0.08	0.12	0.16	0.2	0.24	0.28	0.32	0.36	0.4	0.44	0.48	0.52	0.56	0.6	0.64	0.68	0.72	0.76	0.8	0.84	0.88	0.92	0.96	1	1.04	1.08	1.12	1.16	1.2	1.24	1.28	1.32	1.36	1.4	1.44	1.48	1.52	1.56	1.6	1.64	1.68	1.72	1.76	1.8	1.84	1.88	1.92	1.96	2
NH_acu	-0.185043	-0.0972631	-0.0842045	-0.111543	-0.101101	-0.0804147	-0.0918437	-0.0778286	-0.0485038	-0.0094013	-0.00125883	0.0399744	0.107904	0.259437	0.386798	0.778928	0.84838	1.48366	2.2641	4.46437	11.6137	7.75462	8.36597	9.53412	11.1269	19.6021	7.89149	13.3758	19.93	14.8352	13.4092	11.9519	9.01839	8.41655	6.70599	4.8799	6.41428	7.41364	8.04165	6.30451	6.1772	7.11729	7.3162	6.44295	7.92148	7.70222	7.8095	10.0776	15.2699
NH_all	0.0419483	0.108599	0.117171	0.0762098	0.0912603	0.101944	0.107102	0.129229	0.145858	0.172056	0.193027	0.232453	0.377498	0.553757	0.614654	1.18036	1.36272	1.71639	2.13236	3.74783	5.35716	4.71821	6.16525	8.12591	11.2435	8.8268	15.3995	7.74092	10.5458	8.56329	9.84706	10.2395	8.27813	4.70703	3.75108	4.12589	10.3885	6.75297	8.96775	5.94593	5.4487	5.25363	5.60076	5.96557	7.51525	7.7023	14.292	16.693	22.0731
NH_ano	-0.10467	-0.0420124	-0.0190111	-0.0353204	-0.0233669	-0.0117004	-0.00537905	0.00743392	0.0179787	0.0351654	0.0493524	0.0672051	0.0943536	0.124938	0.158767	0.214206	0.310666	0.460673	0.628159	1.15119	2.01177	2.52486	6.74656	4.4065	3.73318	3.42848	2.62567	2.70416	3.51713	4.58293	6.12525	5.76402	4.27233	3.25469	6.64447	2.3668	4.70313	2.91036	3.12946	2.62775	3.28905	3.09449	2.52988	3.68717	2.63412	4.15371	10.0886	10.5609	9.9777
AH_app	-0.0107926	0.00819887	0.000752662	-0.0254693	-0.023227	-0.02555	-0.0258568	-0.0256255	-0.0170288	-0.00475921	-0.0131262	0.0101313	0.0203364	0.0291507	0.065182	0.12506	0.20106	0.257212	0.368962	0.794752	1.81969	2.36967	2.92066	5.17464	5.69688	5.54018	2.06155	2.52635	3.61008	3.10394	4.81054	5.95109	5.0924	2.27429	2.02691	1.81257	4.36341	2.72005	2.32003	2.51517	2.00507	2.66223	2.76457	2.42665	2.43491	3.27097	7.31427	8.55638	9.83612
NH_au1	-0.221595	-0.114098	-0.0822861	-0.0839456	-0.0657672	-0.0373451	-0.0206721	0.00431156	0.0318848	0.0651824	0.0945308	0.125898	0.188625	0.260687	0.368679	0.504034	0.669271	1.04693	1.39327	2.20936	5.34199	6.59232	13.4768	17.8218	18.5974	18.8905	8.77719	8.53224	14.1642	11.7928	13.5626	16.0726	10.8764	12.7804	3.00956	3.00921	10.7422	7.68641	6.20903	4.32943	4.49495	4.28229	6.47578	6.37552	3.96667	4.51945	8.97147	11.0806	12.7296
AH_ccl	-0.229999	-0.127965	-0.090896	-0.121942	-0.116105	-0.0997748	-0.0889695	-0.0783737	-0.0543422	-0.0249727	-0.00141312	0.0322333	0.0974223	0.26037	0.394064	0.559879	0.833784	1.13225	2.12973	2.55966	4.79346	5.19203	5.8117	6.66214	8.81565	12.52	8.18145	14.2762	19.4929	11.3543	10.6109	11.5052	7.69692	8.33146	5.59396	10.5873	6.93961	11.1194	8.96435	5.41095	5.59694	5.34492	4.79304	5.11517	4.90255	6.38408	10.587	16.1858	14.6981
AH_ccy	-0.0977008	-0.0220209	-0.0207743	-0.0385838	-0.0246922	-0.0207061	-0.0110133	-0.00313482	0.0135994	0.030284	0.0450486	0.0771423	0.112105	0.167377	0.254803	0.400476	0.616774	0.832199	1.0055	1.65379	2.97989	3.52315	4.56778	4.58885	4.14451	4.27231	3.49851	4.80746	7.03149	6.67084	7.82947	9.33275	6.04593	4.72593	4.34537	6.16874	4.86288	6.05381	5.3594	3.92468	4.32042	3.90398	3.45726	3.67005	3.68769	4.55673	9.77497	12.0163	11.6221
NH_cep	-0.172622	-0.0541509	-0.0102366	-0.0284103	-0.00258291	0.0176272	0.0353524	0.0669001	0.0949951	0.124524	0.155463	0.211659	0.281532	0.441053	0.488987	0.771026	1.06154	1.29182	1.51639	2.62932	4.71579	4.53316	6.36692	7.50268	9.94753	8.49602	4.73387	6.35442	8.07575	7.82993	9.45474	10.0448	6.87392	4.90702	3.61659	3.95421	7.30725	5.37036	5.99168	4.22716	4.00686	4.40364	4.50673	4.20263	4.6147	4.93225	7.18108	9.19921	12.9736
NH_chi	0.0209767	0.0134532	0.0353928	-0.000706548	0.00681371	-0.000440102	0.00154755	-0.000678312	-0.00332414	-0.00307566	-0.00593931	-0.00889889	-0.0264068	-0.0236472	0.0257407	0.273392	0.690428	0.742504	2.01961	2.88852	5.38341	5.61005	8.50703	9.23011	8.82654	7.70055	5.45723	7.86611	9.02069	13.4639	14.0841	11.0969	9.78888	6.17801	4.82159	5.84876	6.71249	6.69751	7.93461	6.37337	6.86106	5.44976	5.00666	4.52153	4.35734	6.83396	9.78401	11.0862	28.9297
NH_con	-0.136119	-0.0318205	-0.0180196	-0.0290497	0.00326627	0.0226537	0.0519187	0.086317	0.143653	0.19746	0.227792	0.249364	0.329595	0.475459	0.794911	1.34634	2.11999	4.3949	3.91515	5.32496	7.98214	9.97265	11.322	9.21014	8.00798	7.90745	8.89192	12.4544	16.2643	14.4727	19.4003	17.8543	20.8783	12.6592	9.39962	8.87182	10.2166	9.21033	10.3967	10.9019	9.19857	8.21206	7.44224	7.17823	7.90717	7.9359	9.3123	9.44817	10.0473
NH_dif	0.00397286	0.0265059	0.0220471	-0.00283918	0.00123198	0.00217843	0.00195157	-0.00086012	-0.00542406	-4.13e-05	-0.0142922	-0.0151416	-0.0368581	-0.00779117	0.0643912	0.41201	0.662852	2.44064	2.22235	3.26012	6.94483	7.35662	10.8163	11.8579	12.4025	12.8415	7.94013	11.876	12.4777	12.2563	19.8548	15.6502	22.7145	7.87999	6.2816	8.55955	9.30793	8.56521	9.22184	6.80437	6.46356	5.72216	6.31328	6.35105	7.8118	9.73493	11.8515	10.622	15.6771
NH_dra	-0.0997979	-0.0487002	-0.0260803	-0.0587295	-0.0576016	-0.0482228	-0.0454671	-0.0403558	-0.033288	-0.0233318	-0.00257358	0.0306878	0.0740632	0.68009	1.14715	0.235836	0.38985	0.749862	0.83689	0.925351	1.77427	2.17414	2.48388	4.1977	4.44469	4.26743	2.95559	2.98485	3.92873	4.43404	4.75007	5.29338	4.34279	2.53419	2.00738	2.08202	3.4477	2.27281	2.24401	2.35843	2.02205	2.08256	2.40898	1.87707	2.1182	2.41357	4.29781	4.5184	5.66258
NH_her	-0.128468	-0.0711792	-0.0514393	-0.0719402	-0.0701728	-0.0598631	-0.0592893	-0.0576658	-0.0553104	-0.0501317	-0.0471039	-0.0361405	-0.0364258	-0.0233123	-0.00462609	0.0171192	0.0504062	0.106333	0.188483	0.339563	0.999431	1.45585	1.61295	2.42806	4.25399	3.41417	1.0322	1.81653	2.27405	2.88767	3.17805	4.01232	3.02571	1.64378	0.951452	1.12136	1.92391	1.51862	1.59643	1.45165	1.95689	2.75849	1.38688	1.40231	1.5663	2.24399	3.95736	3.6233	5.98986
NH_mel	-0.251308	-0.137128	-0.10118	-0.114791	-0.0976633	-0.0756718	-0.059868	-0.042184	-0.0140759	0.0125144	0.0564124	0.100722	0.163775	0.349083	0.539693	0.69066	0.780595	1.32829	1.87891	3.12615	5.85437	6.51182	8.66578	10.1917	9.28548	10.1149	5.79164	9.58158	14.1485	15.6989	15.897	18.7067	11.1117	11.387	6.67475	7.45892	8.46806	10.6347	7.54127	5.69633	7.53955	6.2433	5.9788	4.97859	4.15569	5.15822	7.73232	9.33021	12.2219
NH_mic	-0.124691	-0.0243309	-0.000165672	-0.00592952	0.0103782	0.0294423	0.0463033	0.0725418	0.110031	0.152687	0.21613	0.304951	0.414341	1.07964	2.45775	1.4956	2.17728	3.28329	2.5185	2.5551	5.83163	7.51927	7.31198	6.54214	6.92997	7.27483	12.8443	9.34227	9.9376	10.2877	10.6412	13.0447	8.41371	5.80709	4.15013	4.54444	5.75793	6.1132	5.99652	6.11376	5.04143	5.68626	4.7405	4.6228	4.76722	5.53263	8.63966	10.8539	11.1546
NH_nat	-0.184324	-0.0677444	-0.0379852	-0.0400842	-0.0223663	0.00644734	0.022964	0.0603468	0.0952486	0.109433	0.139174	0.194181	0.229072	0.298835	0.403327	0.526763	0.704426	1.13777	1.54545	2.03996	4.0151	5.16543	5.82752	8.23544	12.0384	11.6105	8.09554	8.57634	5.59832	7.10219	8.61993	9.31591	7.00573	5.00829	3.60028	3.59311	5.90299	5.34529	5.02564	4.24976	4.04414	4.62827	5.09964	4.49544	4.30778	5.98296	10.8294	11.3327	17.6362
NH_nun	-0.143323	-0.0124244	0.0379595	0.0467554	0.0835171	0.116967	0.145995	0.194877	0.239541	0.293624	0.360258	0.439329	0.572476	0.868556	1.91455	1.53821	2.63155	4.18157	3.30858	2.82691	4.89422	7.08061	7.14922	8.41837	9.36475	9.63569	11.2844	10.1805	14.902	10.5224	12.7683	14.7203	12.6785	7.48103	4.27676	4.88276	7.28296	7.87986	9.43175	8.23979	6.99876	6.37539	5.3952	5.2204	5.38187	5.91767	9.51201	10.6573	11.7985
NH_nup	-0.125782	-0.0508097	-0.0372943	-0.0619332	-0.0474872	-0.040667	-0.038508	-0.0277816	-0.0266801	-0.0187621	-0.00182223	0.039521	0.0413258	0.0830159	0.143279	0.458404	0.535616	0.624669	0.764692	1.13648	2.83032	3.44923	3.95512	5.33195	5.65978	4.75354	2.57808	2.98144	4.55101	5.25747	5.86946	7.98216	5.63594	2.72986	2.19416	2.51658	4.72266	3.38753	3.49219	3.50506	2.73236	2.27357	2.39375	2.233	2.70499	3.55347	5.50201	6.17864	8.04889
NH_odo	-0.18834	-0.0787543	-0.0451003	-0.069206	-0.0464358	-0.021198	-0.00590463	0.0175934	0.0475452	0.0855982	0.119615	0.174158	0.243823	0.322594	0.463715	0.64372	0.895367	1.24209	1.90148	3.31617	15.0007	15.5189	14.0703	9.28962	10.7937	11.0191	20.7403	44.4558	16.3347	13.4297	17.1719	17.5995	15.4129	12.0117	7.16272	5.24172	7.77671	9.33612	10.3816	14.659	35.4796	9.96831	36.7338	6.98091	4.32791	5.32267	10.6601	12.3814	8.81581
NH_or1	-0.130687	-0.0528827	-0.038636	-0.0551451	-0.0472387	-0.0360674	-0.0327812	-0.0158246	-0.00518738	0.00760755	0.0275708	0.046989	0.072946	0.127364	0.177095	0.269025	0.448041	0.678387	0.861987	1.24875	2.34364	3.94505	9.36723	19.8768	4.5682	4.10275	3.29214	2.96298	3.68684	5.71997	5.71205	6.68616	4.23053	4.16292	23.3116	2.35601	7.25525	6.04094	3.23169	2.79713	2.54831	2.90196	3.95007	8.51564	4.1448	3.92516	7.51189	9.30484	10.045
AH_oxy	-0.243536	-0.155449	-0.150665	-0.178478	-0.165686	-0.166011	-0.16251	-0.153096	-0.147171	-0.137945	-0.127327	-0.112187	-0.074526	-0.0149997	0.0190799	0.13257	0.409131	0.766948	1.03947	1.36144	2.71103	3.21175	3.86262	4.75123	5.7789	4.61679	4.14623	4.9672	6.41039	7.65586	7.99739	7.95629	5.54993	3.95986	3.03854	3.25936	4.48545	3.76077	4.18925	4.91502	3.88906	3.73037	3.89134	4.30858	5.45835	6.02985	7.88942	10.2136	14.1363
NH_pal	-0.132186	-0.0610262	-0.0529341	-0.0752929	-0.0725214	-0.0644606	-0.0656328	-0.0563773	-0.0422567	-0.035904	-0.0241907	-0.0161853	0.0110601	0.0491221	0.111315	0.256038	0.343278	0.542233	0.825059	1.46597	2.18956	3.19948	4.00621	5.56832	6.4767	8.16206	3.52652	4.34929	5.14752	6.05374	7.53068	7.96057	6.03916	3.89072	2.67102	2.80165	4.92365	3.71335	4.203	3.91632	3.03188	2.84236	2.7532	3.09136	3.2755	3.69537	5.87795	7.89581	14.5626
NH_pan	-0.129662	-0.0441677	-0.0224001	-0.0428992	-0.0274514	-0.00652739	0.00659765	0.0231589	0.0465306	0.0718544	0.103418	0.141299	0.208276	0.307339	0.44125	0.870028	1.85492	2.96547	2.79571	3.04385	5.62019	6.71052	9.55952	6.86722	8.92018	8.04717	6.44659	6.08377	7.71913	10.9276	11.2708	13.064	9.95792	5.81525	6.00544	5.10486	7.0189	6.48009	7.09616	6.77176	5.67571	6.01677	5.83772	5.36199	5.21587	5.88894	10.6325	11.4204	14.6044
NHP_ana	-0.121584	-0.0552937	-0.0548492	-0.074379	-0.0664128	-0.0570682	-0.0542739	-0.0500018	-0.0365616	-0.0212768	-0.00447888	0.0167016	0.0546078	0.0962399	0.165656	0.275227	0.493613	0.882645	1.13739	1.79251	3.60791	5.20505	5.75953	6.26798	5.8766	7.51581	3.38377	6.82285	6.80033	8.18484	9.1937	10.5485	8.37817	6.03112	3.50897	3.22959	5.27554	4.26352	4.61819	4.44194	3.78654	4.11982	3.63711	3.95042	4.57178	5.05426	7.0628	8.93468	12.3364
NH_pil	-0.105231	-0.0275507	-0.00807049	-0.0326823	-0.0204127	-0.0158603	-0.00822513	0.00521216	0.0207227	0.0369647	0.0538488	0.0749096	0.105862	0.1477	0.198141	0.417404	0.766578	1.20105	1.08688	1.40384	2.84961	3.68284	5.53393	6.31738	6.77303	6.30429	6.20434	3.21011	4.74551	6.35023	7.17008	8.31619	6.68095	3.27124	2.29485	2.51708	4.6821	3.60424	3.82845	3.07815	3.19273	2.66387	2.99637	3.20869	3.37908	5.24331	9.87128	9.18112	11.5661
AH_pop	-0.0186986	0.0139782	0.00754085	-0.0300003	-0.0317576	-0.0229553	-0.0185877	-0.00810428	0.00159745	0.0123509	0.0292544	0.0432451	0.0785184	0.141053	0.186643	0.304545	0.560588	0.823354	1.17895	1.62999	3.25605	5.80688	8.22287	5.51025	9.26199	7.9588	4.93494	6.28346	7.09346	8.00108	9.56416	10.4055	7.2044	5.78902	4.83676	4.85535	5.90204	5.63964	6.44637	6.60253	6.34107	6.3794	6.68874	5.72023	6.26254	8.28582	15.599	16.0432	19.849
NH_rug	-0.205514	-0.106909	-0.076074	-0.069285	-0.0501261	-0.0231722	0.00962335	0.00447106	-0.00187207	0.010069	0.040608	0.0718943	0.121613	0.178203	0.230507	0.331771	0.459176	0.710014	1.01536	1.6878	3.79902	9.76791	6.11896	9.24859	11.5858	8.32358	3.97162	3.97718	6.69147	5.87711	8.47796	10.0915	8.53922	4.28178	2.50139	2.77468	5.07865	4.48089	4.06061	3.14178	3.93524	4.01268	6.59396	3.69358	2.88373	4.23764	10.9193	10.8067	16.3615
NH_spl	0.024071	0.00766519	0.0346482	-0.000152866	-0.00112096	0.00514681	-0.00303985	-0.00280953	0.00223389	0.0204289	-0.0119371	-0.0141322	-0.0368552	-0.0208096	-0.0196111	0.022392	0.230183	0.614425	1.39556	2.83482	6.46666	8.56441	8.02542	7.42333	9.58058	8.05559	6.56814	15.6502	26.7063	62.4415	15.4038	13.8488	9.40672	10.475	6.16151	5.15563	7.40766	11.444	6.45858	6.84199	8.08298	15.0435	18.3563	11.7469	5.73395	7.94663	13.6923	11.7967	21.837
NH_sub	-0.0811999	-0.0255662	-0.0111739	-0.0364428	-0.0288003	-0.0202039	-0.0149857	-0.00589213	0.00132753	0.0149806	0.0209057	0.0407165	0.0703043	0.0964504	0.174815	0.335752	0.62682	0.580132	0.607773	1.26492	3.1038	2.90193	4.41026	4.43441	6.88262	6.04231	2.51726	3.22136	4.09842	4.202	5.29651	6.58895	4.10618	3.57582	2.2095	2.44094	4.463	2.94379	3.55821	2.82988	3.52824	3.82323	4.57944	2.76127	2.77388	3.15042	5.82374	7.06048	10.795
NH_sut	-0.153871	-0.0714572	-0.0529403	-0.083634	-0.0791681	-0.0656966	-0.0623888	-0.0490687	-0.0356061	-0.0272759	-0.0104769	0.0193925	0.0735311	0.139784	0.249873	0.435177	0.75099	1.08933	1.20636	2.00683	3.42609	6.31426	5.99542	4.70068	6.477	5.64872	6.30707	6.4069	6.51302	7.83409	7.38407	7.88486	5.45195	4.50258	3.95841	3.27567	4.69489	4.26705	4.26295	3.97506	4.02218	4.12037	4.06016	4.45626	5.60053	6.44942	12.1455	13.9456	18.8122
NH_umb	-0.16652	-0.0537155	-0.0217555	-0.0383166	-0.0131474	0.0136231	0.0323996	0.0545396	0.0867929	0.118166	0.159035	0.204511	0.292094	0.384706	0.518852	0.667932	0.952066	1.41625	2.86958	3.47883	12.2004	9.79336	10.9206	10.9094	11.7516	26.0267	19.1864	19.8877	17.3504	14.2861	11.8993	11.0266	8.20276	7.24941	4.34028	4.45344	5.88586	7.23597	6.89652	8.5654	11.8485	7.41065	12.5557	6.45992	7.39423	8.18123	8.2659	10.8887	15.3113
NH_ver	-0.0910619	-0.00495703	-0.00311448	-0.0497024	-0.0335094	-0.0166866	-0.0197958	-0.0228226	-0.0120285	0.00953245	0.0334118	0.0528114	0.146065	0.144962	0.227743	0.421478	1.17366	1.10964	1.24754	3.03765	4.17463	5.55099	6.05252	6.16943	10.3455	11.039	4.62538	5.85392	6.83104	8.88872	10.7449	9.48403	10.192	7.91836	4.45375	4.46956	7.71112	4.80475	7.50965	5.29967	5.84179	7.91366	10.305	5.95743	5.42716	5.67029	12.6462	13.001	15.5433
NH_argy	0.547828	1.14731	0.010893	-0.0287584	-0.0350577	-0.00432651	-0.0057101	-0.0488861	-0.0153359	0.0437654	-0.0193435	-0.0613727	0.0027587	-0.0702949	-0.048577	-0.148524	-0.0598158	0.0308018	-0.469792	0.0394507	2.59117	5.44256	6.82216	5.57719	12.571	7.84406	0.511651	3.5366	4.65789	7.50861	9.58444	11.8386	7.93933	1.06039	2.17081	0.96963	4.19319	0.516478	0.521942	0.312952	-0.22316	-0.14909	0.332915	0.273024	3.98851	3.04735	13.7891	13.3032	30.4227
AH_aden	-3.0174	-1.54573	-1.61653	-1.01611	-0.53474	-0.152945	-0.0429393	-0.00473246	0.00391741	0.00983957	-0.0139515	-0.00263848	-0.000201409	0.00185044	0.0208062	0.111286	0.454517	1.08497	1.67154	2.59342	4.45726	6.33099	7.97009	12.2505	10.4859	9.02779	6.67108	8.74812	9.45781	10.6606	14.1757	19.462	15.1343	10.0415	8.49467	9.71623	12.6234	10.0355	10.1203	8.67538	8.77718	8.59149	9.26956	9.03806	9.06837	10.3952	15.1452	16.0005	22.8888
AH_albi	1.01049	1.17341	-0.0281314	-0.0257085	-0.0211374	-0.0241237	-0.00310043	-0.0122423	-0.00309352	0.0141781	0.00660701	-0.0408759	-0.0121424	0.0106258	-0.0429983	-0.0339787	-0.0897963	-0.153317	0.0584393	1.10351	1.68836	5.92048	13.2733	16.4047	21.6583	16.0031	0.597733	1.28162	2.16504	4.80829	12.7649	13.5428	20.9327	4.40177	0.464783	0.358521	2.58203	0.504985	0.753451	-0.228482	0.181667	-0.166224	1.98037	1.06633	0.150548	3.79241	10.0482	12.7546	24.2734
NH_athr	2.571	1.142	0.0518095	-0.0288267	-0.00493582	-0.0099027	0.0078417	-0.01256	-0.00290855	0.00264149	0.000506044	-0.0391654	-0.0121575	-0.00804841	-0.00609684	0.0847474	0.273587	0.987548	1.60449	2.86282	9.54674	11.0017	6.63918	6.88864	5.89551	5.46507	6.48175	11.9228	14.0722	13.3957	18.9781	18.9555	12.3906	9.43164	8.04971	8.02511	7.70732	7.97219	9.12209	7.22184	7.02365	7.5534	9.16468	6.36371	5.79488	6.93775	11.137	11.2474	14.9843
AH_aure	1.55704	1.21119	0.0875083	0.0104761	-0.0135052	-0.0182482	-0.00978737	-0.00583904	-0.0243998	-0.016751	-0.000439657	-0.016133	-0.0100031	0.00943988	0.146261	0.523665	1.46899	2.92493	3.71163	8.77956	10.9615	11.1938	12.2078	16.2125	23.1503	21.5274	10.3704	12.8369	11.1174	16.2441	35.0272	41.0582	60.9651	40.4804	14.0511	13.1629	17.2268	13.3746	12.6836	12.7084	13.2981	12.896	14.8428	11.607	10.8294	11.1383	16.6753	17.249	21.7995
AH_aure_mon	-0.0352934	0.626367	-0.00563957	-0.0152361	-0.00411983	-0.0122419	-0.00877761	0.00239962	0.00415931	-0.0117436	0.0158656	-0.0309043	-0.00603143	-0.00226498	-0.0587797	-0.0854537	0.00941414	0.540583	0.204265	1.79518	2.90065	3.01967	4.41994	7.12813	9.56432	8.62463	4.5349	4.77603	2.43148	3.28298	9.62451	10.1043	42.248	22.6374	0.542828	0.449064	1.63003	0.839633	1.85167	1.14616	0.57046	0.0329962	0.648022	0.966388	-0.103199	2.52351	6.11239	6.89734	8.60445
AH_caes	1.00097	0.970002	-0.0237337	-0.0346037	-0.0189367	-0.0136414	-0.0136684	-0.0196553	-0.000284652	-0.001187	-0.0111774	-0.0385391	-0.0160933	-0.00276176	-0.0428256	0.00786815	0.0787071	0.545247	1.45969	2.91336	8.15326	13.9318	15.9079	16.23	16.4526	13.3896	14.6395	18.9914	16.2343	17.5169	26.1503	32.9532	30.9225	14.2381	12.1231	11.0113	14.1179	12.2154	13.4729	13.7332	14.8604	13.6711	17.4351	12.262	10.3169	10.6832	17.8671	19.3573	19.4262
NH_call	2.6465	1.28185	0.0707281	-0.0398196	-0.0187216	-0.0174048	-0.00827173	-0.0126746	-0.00486533	0.00987025	-0.0095323	-0.0324228	-0.00303031	0.0076008	-0.0266208	-0.032138	-0.0842567	-0.0425846	-0.203703	-0.385567	0.387867	1.49021	5.07108	6.42594	17.9329	16.3301	6.41681	5.3628	3.70832	5.66799	11.0233	19.4583	15.575	3.28619	1.75598	-0.264982	4.83919	1.27923	0.478714	-0.16301	0.605414	0.431587	1.14316	0.147545	3.77726	2.01869	13.1807	12.1906	8.19359
AH_chry	-1.90428	-0.982007	-1.17824	-0.477648	-0.100275	-0.00854845	0.00253079	-0.00385562	0.0477604	-0.0171521	0.000450413	-0.018796	-0.0307983	-0.0359814	0.0649684	0.00494496	0.1822	0.633436	0.99083	1.80416	3.22713	3.81437	3.53767	4.03746	4.55982	4.09145	3.50499	3.96801	6.73196	6.38397	7.08103	7.46434	3.69991	0.243023	-0.406003	-0.0528057	1.06925	0.268735	0.168431	-0.197823	-0.0199669	0.0399647	0.458543	1.00572	1.89899	4.76087	9.17949	11.4763	14.7037
AH_dasy	0.631858	1.14311	0.142193	0.0267833	-0.0137446	-0.00855642	-0.010403	-0.0185346	0.0147985	0.00463234	0.0115517	-0.02144	-0.0187616	-0.00627101	0.00731179	-0.0237272	-0.0525104	-0.0162989	-0.111654	-0.170992	0.191834	0.6617	2.14281	1.75507	4.23692	3.22299	-0.170523	0.0836037	0.50622	1.09632	3.27257	4.52049	2.52347	0.10004	0.440564	-0.18936	0.983466	0.262563	0.344722	-0.0756749	0.0285752	0.0241437	0.170751	-0.100904	-0.0387472	0.732361	5.78955	5.45572	3.93606
AH_gerb	1.36101	0.983457	0.0655733	-0.00633051	-0.0282025	-0.00712228	-0.0083801	-0.0200044	-0.00375231	0.00300715	0.00362162	-0.0148154	-0.0113062	-0.0188872	-0.0117964	-0.0203899	-0.0597564	0.0489504	-0.0700202	0.706929	1.46047	1.87795	3.56523	4.56957	7.23937	5.81194	2.81171	0.472981	0.735982	3.19316	4.22048	5.00512	6.16875	0.932116	0.552052	-0.0480563	3.22488	0.30968	0.432708	0.212571	0.079882	0.429965	0.221221	1.11901	2.94417	1.86395	7.87671	9.01516	12.6283
AH_harv	-0.10432	0.578168	-0.0023645	-0.0189357	-0.003942	-0.0136585	0.000740374	0.000779716	0.0157312	-0.0197711	0.00827311	-0.00895051	-0.00811182	-0.0116497	-0.0176349	-0.0232968	-0.0578772	-0.051314	-0.014742	-0.206351	0.717306	0.828296	1.10027	1.62628	2.29103	1.86519	3.78186	0.182877	0.44419	1.66042	3.94264	5.39273	3.16211	0.484083	-0.052216	-0.179131	1.23108	0.119063	0.218882	-0.155066	-0.0763523	0.0320172	0.0025633	0.218636	0.943672	1.41116	5.899	7.36435	12.6096
AH_infu	2.49495	1.51915	0.131046	-0.00418997	-0.0325262	-0.014368	-0.0183403	0.0113124	0.00849278	0.0027993	-0.00391323	-0.0140409	-0.0276279	-0.0116826	-0.0401874	-0.0295242	-0.0370821	0.0880432	-0.094851	0.0993699	2.19096	2.24139	5.88451	9.24538	13.4871	10.6005	0.488155	-0.0370958	0.248983	2.61422	7.17258	11.0347	6.76417	0.814967	0.138684	0.807315	4.33206	2.00351	2.05743	0.267669	1.095	1.86155	2.40285	0.327877	0.254591	2.7716	12.008	12.4611	21.1958
AH_krau	8.45615	4.27973	1.63599	0.709562	0.525378	0.515865	-0.190512	-0.30837	-0.133728	-0.0604291	-0.0550248	-0.0254727	-0.0416076	-0.0118614	-0.0536234	-0.0254431	0.170834	0.563508	0.863093	1.50131	4.39315	5.32733	6.326	6.78036	7.37322	7.81189	8.82037	9.73511	10.8485	12.7955	15.2291	16.9157	10.0331	6.07089	4.20544	3.25536	4.18242	4.43472	4.6288	3.06277	1.60812	0.485492	0.381165	0.468869	1.26521	2.96961	7.0418	9.75151	13.3802
AH_lepi	9.47319	4.41498	1.70191	0.616487	0.184707	-0.0195721	-0.0458669	-0.0464283	-0.0379038	-0.00405463	-0.00203119	-0.0216466	0.0446314	0.231072	0.749241	1.41053	2.47662	3.41292	4.43813	7.66638	10.724	12.678	19.0894	16.0849	13.9156	14.0412	12.3765	15.0548	15.7867	19.5871	20.0055	19.0297	15.331	12.8789	15.2955	14.3601	13.8444	13.1684	13.8025	12.7555	11.8971	11.7363	12.4092	13.9075	15.3181	15.6491	19.3063	23.1309	36.7023
AH_mari	5.17371	3.69594	1.45932	0.551618	0.142884	0.0724728	0.0142429	-0.0335436	-0.100346	-0.0343925	-0.0420088	-0.0416682	-0.0123642	0.16208	0.673064	2.01401	4.49606	5.87627	6.02384	7.36154	10.2907	14.064	14.4356	14.4079	15.0166	16.0778	21.0656	15.4586	15.8092	20.3669	22.2917	24.4374	17.4385	15.5461	13.15	12.5362	13.6399	14.103	14.2537	11.3743	11.7272	11.6195	10.6478	9.90052	11.0941	11.2995	14.1896	15.6772	21.5477
NH_mill	0.298358	0.944676	-0.048439	0.0252025	-0.0234604	-0.0381028	-0.0245575	0.0057247	0.000914039	-0.018705	0.0832704	-0.0455221	-0.0385591	-0.0410434	-0.0320604	-0.0362652	-0.13363	0.0667692	0.737029	0.673019	3.38767	4.52609	6.75027	7.97334	18.9039	18.1446	11.2663	4.30248	5.66748	8.28604	23.8612	28.0376	57.4193	41.5075	0.268028	0.513286	4.07459	1.20243	2.32784	1.47569	0.835503	0.609715	3.18059	0.724707	-0.324701	2.02586	9.41962	10.1365	14.5516
AH_mime	10.9688	4.44215	1.4674	0.482476	0.0987103	-0.0132105	-0.042415	-0.0243522	-0.0203798	0.000920458	-0.00626045	-0.0152866	-0.0166151	0.0322189	0.167691	0.554736	1.21524	1.95372	2.78491	4.60105	8.02787	10.3535	16.874	18.0696	20.2893	17.8692	11.8402	12.7367	14.4755	18.2264	23.1389	24.0162	17.2684	12.0443	11.6387	11.634	13.2029	13.3456	14.2217	11.4686	10.6745	10.7847	11.6113	11.7502	11.8236	13.0218	18.0258	20.8986	29.0461
NH_mund	0.6316	1.53693	0.0259889	-0.0324749	-0.0332529	0.0146932	-0.028971	-0.0191503	-0.0025884	0.000865529	0.0137986	-0.0157105	-0.0298398	-0.0213534	-0.0330407	-0.094052	0.0360681	0.231812	0.0746734	1.07698	4.16806	5.10326	10.7423	14.6384	24.7356	19.0638	0.391665	0.0673704	0.843568	4.62219	19.9082	25.2525	18.2278	2.56443	0.0167734	0.338647	4.82362	4.44629	6.75319	1.90371	1.87123	1.31785	1.72745	0.596297	0.621199	3.68724	9.80538	13.4057	30.2721
AH_muta	1.27415	0.855762	-0.0326488	-0.044836	-0.0102695	-0.0189467	-0.0111905	-0.0241627	0.00645701	-0.0138768	0.0233522	-0.0225658	-0.0332964	-0.0316297	-0.00150643	0.123842	0.193943	0.604168	1.35495	2.46921	4.34184	5.86447	8.85049	12.5522	18.8929	16.6099	6.50848	7.8264	9.32445	14.218	33.7431	36.9846	64.8439	39.4371	8.51937	8.0511	10.8296	8.68193	9.66017	9.29303	9.09922	9.01837	10.2115	10.6829	8.6448	10.2504	15.2962	16.6552	19.0049
AH_opac	6.04124	4.03761	1.71253	0.64245	0.108673	0.0614207	0.117561	-0.149442	-0.217478	-0.0728758	-0.0317737	-0.0318515	-0.0352619	-0.0450305	0.0340136	-0.0485669	-0.0801432	0.00726737	0.118957	2.70278	5.2036	3.93704	7.80212	9.92972	17.6794	15.4034	12.3391	4.15463	6.01375	10.3884	10.3878	14.2202	10.8496	2.21385	0.768753	0.71847	5.37646	3.58507	4.17766	2.61944	3.11846	4.34992	4.68271	6.09446	10.2088	7.66936	13.1578	17.2002	20.9163
AH_patu	5.36021	3.41678	1.24549	0.473994	0.140089	0.114654	-0.0124715	-0.111153	-0.0590736	-0.0408005	-0.00533666	-0.0286848	-0.037272	-0.0138209	-0.00505187	-0.037756	0.0387459	0.397099	0.778887	1.11878	3.46328	4.52496	4.60645	3.12184	2.68145	2.56565	2.74568	4.48758	6.09437	5.8386	11.0755	12.2295	6.78854	2.82924	2.05178	1.36266	1.44645	1.94561	2.5923	1.01591	0.278043	0.0794772	0.105913	0.249907	1.28782	1.11709	3.05136	4.74225	11.4839
NH_peti	0.0396048	0.420174	-0.00815135	-0.00684043	-0.00727566	-0.00933429	-0.00048106	-0.00371972	-0.00472974	0.00269158	0.000879026	-0.01013	-0.0188526	-0.0142996	-0.0308411	-0.043517	-0.0185415	0.0318422	0.118251	0.119882	1.89028	3.57129	4.66248	2.7066	3.41813	3.09454	0.856525	1.86252	2.34496	2.10609	7.66991	8.00712	5.17381	1.06045	0.421811	-0.0957242	0.263265	0.0863115	0.731242	0.188059	-0.253428	-0.125784	0.0207594	-0.0488341	0.0436855	1.23347	4.53881	4.36009	11.9361
AH_plat	1.54479	1.41469	-0.0178265	-0.160617	-0.0582356	-0.0638322	-0.0288674	-0.0640678	-0.0112808	0.0456492	-0.0117054	-0.0167487	-0.0348585	0.0154486	-0.0296202	-0.0895896	-0.0517724	0.0274412	-0.218884	-0.378753	0.398887	0.286087	0.611063	-0.0379777	5.02674	7.35043	-0.86255	0.0378713	0.258051	0.985257	3.25918	2.02748	2.87506	-0.318995	-0.433796	-0.499659	0.283185	0.0591037	0.760475	6.74563	1.83076	4.46783	-0.118143	-0.175624	-0.0893749	1.3961	5.18768	5.35685	7.70799
NH_poly	2.48788	1.49488	0.172219	-0.00832564	-0.027623	-0.00616629	-0.021342	-0.0280123	0.00157652	0.00187991	0.0239445	-0.0664193	0.00506904	-0.0231108	-0.00936715	-0.0477229	-0.0793559	0.0201292	0.125636	1.64604	5.04537	9.35839	5.73737	5.1658	6.98687	6.75741	12.3167	6.29467	4.99979	18.4375	16.2506	16.2427	8.07128	4.55203	3.86437	2.58603	3.35979	4.02743	4.02606	1.44583	1.78544	1.94411	0.712953	1.09702	0.943586	3.38251	11.9303	13.0959	18.5579
AH_quin	1.91132	1.42536	0.346173	0.199316	-0.19898	-0.158337	-0.0940165	-0.0228771	-0.00945732	0.0187307	-0.0136219	-0.0190956	0.00516248	-0.00630212	-0.0347274	-0.00114266	-0.0235799	0.0206168	0.0407283	0.0843054	0.90312	1.68076	2.93018	4.62641	7.66823	6.26754	2.95864	1.53421	2.13502	1.94406	5.41001	6.1878	5.01788	1.08202	0.208794	-0.111421	2.15035	0.407027	0.316575	-0.0290224	0.145104	-0.135128	0.109641	0.278063	0.480001	3.09068	10.5532	11.7045	12.9749
NH_refl	18.3569	10.6715	6.91011	4.89323	3.62139	2.73505	1.917	1.36867	0.896425	0.349016	0.0406943	-0.0132767	0.125102	0.151378	0.836148	1.03923	1.46242	2.14685	3.21651	4.47902	7.25351	10.738	14.5064	17.3926	25.4332	23.2642	17.6606	13.7836	13.6922	16.3006	24.1948	25.7454	21.8357	15.6523	13.602	13.6835	16.2389	15.551	16.2778	14.8342	14.0968	14.549	14.6743	13.4838	13.2732	15.3799	22.4197	23.8777	28.0662
NH_schl	1.90298	1.68226	0.432549	0.051283	-0.00213227	-0.0451454	-0.0462284	-0.0255142	-0.00877738	-0.000253111	0.00884996	-0.0203585	-0.00985976	-0.0261098	-0.0178409	-0.0432843	-0.0463245	-0.0553225	0.203686	1.13746	4.44414	5.72601	3.29648	3.03281	6.15856	5.47852	5.09438	1.25934	3.50609	2.78236	7.05591	7.82547	6.85292	0.588149	-0.311971	-0.196612	3.6065	0.690359	0.823984	0.59087	0.441791	0.421814	1.39158	0.53279	-0.126428	2.49624	8.88444	9.07433	13.4433
AH_seto	2.68945	1.76221	0.444921	0.0179751	0.0286318	-0.0140222	0.0593012	-0.0944807	-0.16118	-0.0806231	-0.0163459	-0.0524398	0.0170363	0.097245	0.415141	1.22224	2.35617	4.32796	6.47531	10.2724	15.5423	18.0756	19.6935	19.9269	18.2981	19.1622	21.5464	19.8584	21.9658	26.7748	43.3718	43.5551	31.628	22.4084	18.6117	18.2189	20.1822	18.8695	20.3839	18.806	19.503	19.3348	17.9411	17.0058	15.9716	18.4075	23.5751	26.25	36.6059
AH_trun	7.47461	3.39818	1.10373	0.465263	0.0606048	-0.0315721	0.0130358	-0.084712	-0.068378	0.0500787	-0.0919786	-0.148966	-0.1572	-0.0595551	0.139742	0.476116	0.956915	1.46596	2.19277	3.51424	6.91824	8.06273	11.276	12.7869	14.4139	11.5652	6.7535	13.1797	9.80624	13.1175	18.6403	16.3289	10.153	4.72507	3.68153	5.20421	7.07319	4.30659	3.37256	0.99394	0.151088	-0.00512671	0.360272	0.509516	1.7504	4.30498	11.5954	13.9731	21.0035
AH_wilm	3.45608	2.34829	0.372293	-0.0518259	-0.0342646	0.124272	1.06836	0.876873	0.173764	-0.0690991	-0.0202277	-0.00403456	-0.126089	-0.31281	-0.263375	0.050863	0.295578	0.19794	0.678406	2.26643	7.18124	8.35283	11.9705	10.3418	18.8835	14.64	5.96415	6.18249	6.15556	13.4673	17.3482	17.7091	11.2657	5.29801	0.954086	0.577615	3.92965	3.21498	4.46875	1.24033	0.489588	0.930888	0.720525	-0.510437	0.119175	1.05487	7.89405	9.91273	16.1127
AH_zeyh	0.191415	0.509241	0.00117809	-0.0255641	-0.0610251	0.0396093	-0.0889516	-0.0417616	0.43094	0.598157	-0.0337626	0.0202923	-0.036934	-0.0313481	-0.0822742	-0.0701105	-0.00922936	0.0114868	0.014032	0.315486	1.66679	2.36132	2.788	2.122	1.65821	1.48638	1.88999	2.05299	2.96974	5.50102	15.6858	16.1326	27.2344	12.8215	2.48602	1.26718	1.55925	0.949298	2.58248	1.01081	0.0858191	0.0228113	0.597274	1.3344	0.00334824	1.92582	7.36883	6.97731	10.7436
[truncated: 200 more columns]

## Sheet: Simin NMR data
	0.08	0.12	0.16	0.2	0.24	0.28	0.32	0.36	0.4	0.44	0.48	0.52	0.56	0.6	0.64	0.68	0.72	0.76	0.8	0.84	0.88	0.92	0.96	1	1.04	1.08	1.12	1.16	1.2	1.24	1.28	1.32	1.36	1.4	1.44	1.48	1.52	1.56	1.6	1.64	1.68	1.72	1.76	1.8	1.84	1.88	1.92	1.96	2
NH_argy	0.547828	1.14731	0.010893	-0.0287584	-0.0350577	-0.00432651	-0.0057101	-0.0488861	-0.0153359	0.0437654	-0.0193435	-0.0613727	0.0027587	-0.0702949	-0.048577	-0.148524	-0.0598158	0.0308018	-0.469792	0.0394507	2.59117	5.44256	6.82216	5.57719	12.571	7.84406	0.511651	3.5366	4.65789	7.50861	9.58444	11.8386	7.93933	1.06039	2.17081	0.96963	4.19319	0.516478	0.521942	0.312952	-0.22316	-0.14909	0.332915	0.273024	3.98851	3.04735	13.7891	13.3032	30.4227
AH_aden	-3.0174	-1.54573	-1.61653	-1.01611	-0.53474	-0.152945	-0.0429393	-0.00473246	0.00391741	0.00983957	-0.0139515	-0.00263848	-0.000201409	0.00185044	0.0208062	0.111286	0.454517	1.08497	1.67154	2.59342	4.45726	6.33099	7.97009	12.2505	10.4859	9.02779	6.67108	8.74812	9.45781	10.6606	14.1757	19.462	15.1343	10.0415	8.49467	9.71623	12.6234	10.0355	10.1203	8.67538	8.77718	8.59149	9.26956	9.03806	9.06837	10.3952	15.1452	16.0005	22.8888
AH_albi	1.01049	1.17341	-0.0281314	-0.0257085	-0.0211374	-0.0241237	-0.00310043	-0.0122423	-0.00309352	0.0141781	0.00660701	-0.0408759	-0.0121424	0.0106258	-0.0429983	-0.0339787	-0.0897963	-0.153317	0.0584393	1.10351	1.68836	5.92048	13.2733	16.4047	21.6583	16.0031	0.597733	1.28162	2.16504	4.80829	12.7649	13.5428	20.9327	4.40177	0.464783	0.358521	2.58203	0.504985	0.753451	-0.228482	0.181667	-0.166224	1.98037	1.06633	0.150548	3.79241	10.0482	12.7546	24.2734
NH_athr	2.571	1.142	0.0518095	-0.0288267	-0.00493582	-0.0099027	0.0078417	-0.01256	-0.00290855	0.00264149	0.000506044	-0.0391654	-0.0121575	-0.00804841	-0.00609684	0.0847474	0.273587	0.987548	1.60449	2.86282	9.54674	11.0017	6.63918	6.88864	5.89551	5.46507	6.48175	11.9228	14.0722	13.3957	18.9781	18.9555	12.3906	9.43164	8.04971	8.02511	7.70732	7.97219	9.12209	7.22184	7.02365	7.5534	9.16468	6.36371	5.79488	6.93775	11.137	11.2474	14.9843
AH_aure	1.55704	1.21119	0.0875083	0.0104761	-0.0135052	-0.0182482	-0.00978737	-0.00583904	-0.0243998	-0.016751	-0.000439657	-0.016133	-0.0100031	0.00943988	0.146261	0.523665	1.46899	2.92493	3.71163	8.77956	10.9615	11.1938	12.2078	16.2125	23.1503	21.5274	10.3704	12.8369	11.1174	16.2441	35.0272	41.0582	60.9651	40.4804	14.0511	13.1629	17.2268	13.3746	12.6836	12.7084	13.2981	12.896	14.8428	11.607	10.8294	11.1383	16.6753	17.249	21.7995
AH_aure_mon	-0.0352934	0.626367	-0.00563957	-0.0152361	-0.00411983	-0.0122419	-0.00877761	0.00239962	0.00415931	-0.0117436	0.0158656	-0.0309043	-0.00603143	-0.00226498	-0.0587797	-0.0854537	0.00941414	0.540583	0.204265	1.79518	2.90065	3.01967	4.41994	7.12813	9.56432	8.62463	4.5349	4.77603	2.43148	3.28298	9.62451	10.1043	42.248	22.6374	0.542828	0.449064	1.63003	0.839633	1.85167	1.14616	0.57046	0.0329962	0.648022	0.966388	-0.103199	2.52351	6.11239	6.89734	8.60445
AH_caes	1.00097	0.970002	-0.0237337	-0.0346037	-0.0189367	-0.0136414	-0.0136684	-0.0196553	-0.000284652	-0.001187	-0.0111774	-0.0385391	-0.0160933	-0.00276176	-0.0428256	0.00786815	0.0787071	0.545247	1.45969	2.91336	8.15326	13.9318	15.9079	16.23	16.4526	13.3896	14.6395	18.9914	16.2343	17.5169	26.1503	32.9532	30.9225	14.2381	12.1231	11.0113	14.1179	12.2154	13.4729	13.7332	14.8604	13.6711	17.4351	12.262	10.3169	10.6832	17.8671	19.3573	19.4262
NH_call	2.6465	1.28185	0.0707281	-0.0398196	-0.0187216	-0.0174048	-0.00827173	-0.0126746	-0.00486533	0.00987025	-0.0095323	-0.0324228	-0.00303031	0.0076008	-0.0266208	-0.032138	-0.0842567	-0.0425846	-0.203703	-0.385567	0.387867	1.49021	5.07108	6.42594	17.9329	16.3301	6.41681	5.3628	3.70832	5.66799	11.0233	19.4583	15.575	3.28619	1.75598	-0.264982	4.83919	1.27923	0.478714	-0.16301	0.605414	0.431587	1.14316	0.147545	3.77726	2.01869	13.1807	12.1906	8.19359
AH_chry	-1.90428	-0.982007	-1.17824	-0.477648	-0.100275	-0.00854845	0.00253079	-0.00385562	0.0477604	-0.0171521	0.000450413	-0.018796	-0.0307983	-0.0359814	0.0649684	0.00494496	0.1822	0.633436	0.99083	1.80416	3.22713	3.81437	3.53767	4.03746	4.55982	4.09145	3.50499	3.96801	6.73196	6.38397	7.08103	7.46434	3.69991	0.243023	-0.406003	-0.0528057	1.06925	0.268735	0.168431	-0.197823	-0.0199669	0.0399647	0.458543	1.00572	1.89899	4.76087	9.17949	11.4763	14.7037
AH_dasy	0.631858	1.14311	0.142193	0.0267833	-0.0137446	-0.00855642	-0.010403	-0.0185346	0.0147985	0.00463234	0.0115517	-0.02144	-0.0187616	-0.00627101	0.00731179	-0.0237272	-0.0525104	-0.0162989	-0.111654	-0.170992	0.191834	0.6617	2.14281	1.75507	4.23692	3.22299	-0.170523	0.0836037	0.50622	1.09632	3.27257	4.52049	2.52347	0.10004	0.440564	-0.18936	0.983466	0.262563	0.344722	-0.0756749	0.0285752	0.0241437	0.170751	-0.100904	-0.0387472	0.732361	5.78955	5.45572	3.93606
AH_gerb	1.36101	0.983457	0.0655733	-0.00633051	-0.0282025	-0.00712228	-0.0083801	-0.0200044	-0.00375231	0.00300715	0.00362162	-0.0148154	-0.0113062	-0.0188872	-0.0117964	-0.0203899	-0.0597564	0.0489504	-0.0700202	0.706929	1.46047	1.87795	3.56523	4.56957	7.23937	5.81194	2.81171	0.472981	0.735982	3.19316	4.22048	5.00512	6.16875	0.932116	0.552052	-0.0480563	3.22488	0.30968	0.432708	0.212571	0.079882	0.429965	0.221221	1.11901	2.94417	1.86395	7.87671	9.01516	12.6283
AH_harv	-0.10432	0.578168	-0.0023645	-0.0189357	-0.003942	-0.0136585	0.000740374	0.000779716	0.0157312	-0.0197711	0.00827311	-0.00895051	-0.00811182	-0.0116497	-0.0176349	-0.0232968	-0.0578772	-0.051314	-0.014742	-0.206351	0.717306	0.828296	1.10027	1.62628	2.29103	1.86519	3.78186	0.182877	0.44419	1.66042	3.94264	5.39273	3.16211	0.484083	-0.052216	-0.179131	1.23108	0.119063	0.218882	-0.155066	-0.0763523	0.0320172	0.0025633	0.218636	0.943672	1.41116	5.899	7.36435	12.6096
AH_infu	2.49495	1.51915	0.131046	-0.00418997	-0.0325262	-0.014368	-0.0183403	0.0113124	0.00849278	0.0027993	-0.00391323	-0.0140409	-0.0276279	-0.0116826	-0.0401874	-0.0295242	-0.0370821	0.0880432	-0.094851	0.0993699	2.19096	2.24139	5.88451	9.24538	13.4871	10.6005	0.488155	-0.0370958	0.248983	2.61422	7.17258	11.0347	6.76417	0.814967	0.138684	0.807315	4.33206	2.00351	2.05743	0.267669	1.095	1.86155	2.40285	0.327877	0.254591	2.7716	12.008	12.4611	21.1958
AH_krau	8.45615	4.27973	1.63599	0.709562	0.525378	0.515865	-0.190512	-0.30837	-0.133728	-0.0604291	-0.0550248	-0.0254727	-0.0416076	-0.0118614	-0.0536234	-0.0254431	0.170834	0.563508	0.863093	1.50131	4.39315	5.32733	6.326	6.78036	7.37322	7.81189	8.82037	9.73511	10.8485	12.7955	15.2291	16.9157	10.0331	6.07089	4.20544	3.25536	4.18242	4.43472	4.6288	3.06277	1.60812	0.485492	0.381165	0.468869	1.26521	2.96961	7.0418	9.75151	13.3802
AH_lepi	9.47319	4.41498	1.70191	0.616487	0.184707	-0.0195721	-0.0458669	-0.0464283	-0.0379038	-0.00405463	-0.00203119	-0.0216466	0.0446314	0.231072	0.749241	1.41053	2.47662	3.41292	4.43813	7.66638	10.724	12.678	19.0894	16.0849	13.9156	14.0412	12.3765	15.0548	15.7867	19.5871	20.0055	19.0297	15.331	12.8789	15.2955	14.3601	13.8444	13.1684	13.8025	12.7555	11.8971	11.7363	12.4092	13.9075	15.3181	15.6491	19.3063	23.1309	36.7023
AH_mari	5.17371	3.69594	1.45932	0.551618	0.142884	0.0724728	0.0142429	-0.0335436	-0.100346	-0.0343925	-0.0420088	-0.0416682	-0.0123642	0.16208	0.673064	2.01401	4.49606	5.87627	6.02384	7.36154	10.2907	14.064	14.4356	14.4079	15.0166	16.0778	21.0656	15.4586	15.8092	20.3669	22.2917	24.4374	17.4385	15.5461	13.15	12.5362	13.6399	14.103	14.2537	11.3743	11.7272	11.6195	10.6478	9.90052	11.0941	11.2995	14.1896	15.6772	21.5477
NH_mill	0.298358	0.944676	-0.048439	0.0252025	-0.0234604	-0.0381028	-0.0245575	0.0057247	0.000914039	-0.018705	0.0832704	-0.0455221	-0.0385591	-0.0410434	-0.0320604	-0.0362652	-0.13363	0.0667692	0.737029	0.673019	3.38767	4.52609	6.75027	7.97334	18.9039	18.1446	11.2663	4.30248	5.66748	8.28604	23.8612	28.0376	57.4193	41.5075	0.268028	0.513286	4.07459	1.20243	2.32784	1.47569	0.835503	0.609715	3.18059	0.724707	-0.324701	2.02586	9.41962	10.1365	14.5516
AH_mime	10.9688	4.44215	1.4674	0.482476	0.0987103	-0.0132105	-0.042415	-0.0243522	-0.0203798	0.000920458	-0.00626045	-0.0152866	-0.0166151	0.0322189	0.167691	0.554736	1.21524	1.95372	2.78491	4.60105	8.02787	10.3535	16.874	18.0696	20.2893	17.8692	11.8402	12.7367	14.4755	18.2264	23.1389	24.0162	17.2684	12.0443	11.6387	11.634	13.2029	13.3456	14.2217	11.4686	10.6745	10.7847	11.6113	11.7502	11.8236	13.0218	18.0258	20.8986	29.0461
NH_mund	0.6316	1.53693	0.0259889	-0.0324749	-0.0332529	0.0146932	-0.028971	-0.0191503	-0.0025884	0.000865529	0.0137986	-0.0157105	-0.0298398	-0.0213534	-0.0330407	-0.094052	0.0360681	0.231812	0.0746734	1.07698	4.16806	5.10326	10.7423	14.6384	24.7356	19.0638	0.391665	0.0673704	0.843568	4.62219	19.9082	25.2525	18.2278	2.56443	0.0167734	0.338647	4.82362	4.44629	6.75319	1.90371	1.87123	1.31785	1.72745	0.596297	0.621199	3.68724	9.80538	13.4057	30.2721
AH_muta	1.27415	0.855762	-0.0326488	-0.044836	-0.0102695	-0.0189467	-0.0111905	-0.0241627	0.00645701	-0.0138768	0.0233522	-0.0225658	-0.0332964	-0.0316297	-0.00150643	0.123842	0.193943	0.604168	1.35495	2.46921	4.34184	5.86447	8.85049	12.5522	18.8929	16.6099	6.50848	7.8264	9.32445	14.218	33.7431	36.9846	64.8439	39.4371	8.51937	8.0511	10.8296	8.68193	9.66017	9.29303	9.09922	9.01837	10.2115	10.6829	8.6448	10.2504	15.2962	16.6552	19.0049
AH_opac	6.04124	4.03761	1.71253	0.64245	0.108673	0.0614207	0.117561	-0.149442	-0.217478	-0.0728758	-0.0317737	-0.0318515	-0.0352619	-0.0450305	0.0340136	-0.0485669	-0.0801432	0.00726737	0.118957	2.70278	5.2036	3.93704	7.80212	9.92972	17.6794	15.4034	12.3391	4.15463	6.01375	10.3884	10.3878	14.2202	10.8496	2.21385	0.768753	0.71847	5.37646	3.58507	4.17766	2.61944	3.11846	4.34992	4.68271	6.09446	10.2088	7.66936	13.1578	17.2002	20.9163
AH_patu	5.36021	3.41678	1.24549	0.473994	0.140089	0.114654	-0.0124715	-0.111153	-0.0590736	-0.0408005	-0.00533666	-0.0286848	-0.037272	-0.0138209	-0.00505187	-0.037756	0.0387459	0.397099	0.778887	1.11878	3.46328	4.52496	4.60645	3.12184	2.68145	2.56565	2.74568	4.48758	6.09437	5.8386	11.0755	12.2295	6.78854	2.82924	2.05178	1.36266	1.44645	1.94561	2.5923	1.01591	0.278043	0.0794772	0.105913	0.249907	1.28782	1.11709	3.05136	4.74225	11.4839
NH_peti	0.0396048	0.420174	-0.00815135	-0.00684043	-0.00727566	-0.00933429	-0.00048106	-0.00371972	-0.00472974	0.00269158	0.000879026	-0.01013	-0.0188526	-0.0142996	-0.0308411	-0.043517	-0.0185415	0.0318422	0.118251	0.119882	1.89028	3.57129	4.66248	2.7066	3.41813	3.09454	0.856525	1.86252	2.34496	2.10609	7.66991	8.00712	5.17381	1.06045	0.421811	-0.0957242	0.263265	0.0863115	0.731242	0.188059	-0.253428	-0.125784	0.0207594	-0.0488341	0.0436855	1.23347	4.53881	4.36009	11.9361
AH_plat	1.54479	1.41469	-0.0178265	-0.160617	-0.0582356	-0.0638322	-0.0288674	-0.0640678	-0.0112808	0.0456492	-0.0117054	-0.0167487	-0.0348585	0.0154486	-0.0296202	-0.0895896	-0.0517724	0.0274412	-0.218884	-0.378753	0.398887	0.286087	0.611063	-0.0379777	5.02674	7.35043	-0.86255	0.0378713	0.258051	0.985257	3.25918	2.02748	2.87506	-0.318995	-0.433796	-0.499659	0.283185	0.0591037	0.760475	6.74563	1.83076	4.46783	-0.118143	-0.175624	-0.0893749	1.3961	5.18768	5.35685	7.70799
NH_poly	2.48788	1.49488	0.172219	-0.00832564	-0.027623	-0.00616629	-0.021342	-0.0280123	0.00157652	0.00187991	0.0239445	-0.0664193	0.00506904	-0.0231108	-0.00936715	-0.0477229	-0.0793559	0.0201292	0.125636	1.64604	5.04537	9.35839	5.73737	5.1658	6.98687	6.75741	12.3167	6.29467	4.99979	18.4375	16.2506	16.2427	8.07128	4.55203	3.86437	2.58603	3.35979	4.02743	4.02606	1.44583	1.78544	1.94411	0.712953	1.09702	0.943586	3.38251	11.9303	13.0959	18.5579
AH_quin	1.91132	1.42536	0.346173	0.199316	-0.19898	-0.158337	-0.0940165	-0.0228771	-0.00945732	0.0187307	-0.0136219	-0.0190956	0.00516248	-0.00630212	-0.0347274	-0.00114266	-0.0235799	0.0206168	0.0407283	0.0843054	0.90312	1.68076	2.93018	4.62641	7.66823	6.26754	2.95864	1.53421	2.13502	1.94406	5.41001	6.1878	5.01788	1.08202	0.208794	-0.111421	2.15035	0.407027	0.316575	-0.0290224	0.145104	-0.135128	0.109641	0.278063	0.480001	3.09068	10.5532	11.7045	12.9749
NH_refl	18.3569	10.6715	6.91011	4.89323	3.62139	2.73505	1.917	1.36867	0.896425	0.349016	0.0406943	-0.0132767	0.125102	0.151378	0.836148	1.03923	1.46242	2.14685	3.21651	4.47902	7.25351	10.738	14.5064	17.3926	25.4332	23.2642	17.6606	13.7836	13.6922	16.3006	24.1948	25.7454	21.8357	15.6523	13.602	13.6835	16.2389	15.551	16.2778	14.8342	14.0968	14.549	14.6743	13.4838	13.2732	15.3799	22.4197	23.8777	28.0662
NH_schl	1.90298	1.68226	0.432549	0.051283	-0.00213227	-0.0451454	-0.0462284	-0.0255142	-0.00877738	-0.000253111	0.00884996	-0.0203585	-0.00985976	-0.0261098	-0.0178409	-0.0432843	-0.0463245	-0.0553225	0.203686	1.13746	4.44414	5.72601	3.29648	3.03281	6.15856	5.47852	5.09438	1.25934	3.50609	2.78236	7.05591	7.82547	6.85292	0.588149	-0.311971	-0.196612	3.6065	0.690359	0.823984	0.59087	0.441791	0.421814	1.39158	0.53279	-0.126428	2.49624	8.88444	9.07433	13.4433
AH_seto	2.68945	1.76221	0.444921	0.0179751	0.0286318	-0.0140222	0.0593012	-0.0944807	-0.16118	-0.0806231	-0.0163459	-0.0524398	0.0170363	0.097245	0.415141	1.22224	2.35617	4.32796	6.47531	10.2724	15.5423	18.0756	19.6935	19.9269	18.2981	19.1622	21.5464	19.8584	21.9658	26.7748	43.3718	43.5551	31.628	22.4084	18.6117	18.2189	20.1822	18.8695	20.3839	18.806	19.503	19.3348	17.9411	17.0058	15.9716	18.4075	23.5751	26.25	36.6059
AH_trun	7.47461	3.39818	1.10373	0.465263	0.0606048	-0.0315721	0.0130358	-0.084712	-0.068378	0.0500787	-0.0919786	-0.148966	-0.1572	-0.0595551	0.139742	0.476116	0.956915	1.46596	2.19277	3.51424	6.91824	8.06273	11.276	12.7869	14.4139	11.5652	6.7535	13.1797	9.80624	13.1175	18.6403	16.3289	10.153	4.72507	3.68153	5.20421	7.07319	4.30659	3.37256	0.99394	0.151088	-0.00512671	0.360272	0.509516	1.7504	4.30498	11.5954	13.9731	21.0035
AH_wilm	3.45608	2.34829	0.372293	-0.0518259	-0.0342646	0.124272	1.06836	0.876873	0.173764	-0.0690991	-0.0202277	-0.00403456	-0.126089	-0.31281	-0.263375	0.050863	0.295578	0.19794	0.678406	2.26643	7.18124	8.35283	11.9705	10.3418	18.8835	14.64	5.96415	6.18249	6.15556	13.4673	17.3482	17.7091	11.2657	5.29801	0.954086	0.577615	3.92965	3.21498	4.46875	1.24033	0.489588	0.930888	0.720525	-0.510437	0.119175	1.05487	7.89405	9.91273	16.1127
AH_zeyh	0.191415	0.509241	0.00117809	-0.0255641	-0.0610251	0.0396093	-0.0889516	-0.0417616	0.43094	0.598157	-0.0337626	0.0202923	-0.036934	-0.0313481	-0.0822742	-0.0701105	-0.00922936	0.0114868	0.014032	0.315486	1.66679	2.36132	2.788	2.122	1.65821	1.48638	1.88999	2.05299	2.96974	5.50102	15.6858	16.1326	27.2344	12.8215	2.48602	1.26718	1.55925	0.949298	2.58248	1.01081	0.0858191	0.0228113	0.597274	1.3344	0.00334824	1.92582	7.36883	6.97731	10.7436
[truncated: 200 more columns]

## Sheet: Abbreviations
Helichrysum species and abbrviations
Helichrysum: H
Non-active: N
Active: A
H. acutatum	NH_acu
H. alliodes	NH_all
H. anomalum	NH_ano
H. appendiculatum	AH_app
H. aureonitens	NH_au1
H. cymosum sp. calvum	AH_ccl
H. cymosum sp. cymosum	AH_ccy
H. cephaloideum	NH_cep
H. chionosphaerum	NH_chi
H. confertum	NH_con
H. difficle	NH_dif
H. drakensbergense	NH_dra
H. herbaceum	NH_her
H. melanacme	NH_mel
H. miconiifolium	NH_mic
H. natalitium	NH_nat
H. nudifolium var. nudifolium	NH_nun
H. pilosellum	NH_nup
H. odoratissimum	NH_odo
H. oreophilium	NH_or1
H. oxyphyllum	AH_oxy
H. pallidum	NH_pal
H. panduratum	NH_pan
H. pannosum	NH_pann
H. pilosellum	NH_pil
H. populifoium	AH_pop
H. rugulosum	NH_rug
H. splendidium	NH_spl
H. subluteum	NH_sub
H. sutherlandii	NH_sut
H. umbraculigerum	NH_umb
H. vernum	NH_ver
H. argyrophyllum	NH_argy
H. adenocarpum	AH_aden
H. albilanatum	AH_albi
H. athrixiifolium	NH_athr
H. aureum var. aureum	AH_aure
H. aureum var. monocephalum	AH_aure_mon
H. caespititium	AH_caes
H. callicomum	NH_call
H. chrysargyrum	AH_chry
H. dasyanthum	AH_dasy
H. gerberifolium	AH_gerb
H. harveyanum	AH_harv
H. infuscum	AH_infu
H. kraussii	AH_krau
H. lepidissimum	AH_lepi
H. mariepscopicum	AH_mari
H. milleri	NH_mill
H. mimetes	AH_mime
H. mundtii	NH_mund
H. mutabile	AH_muta
H. opacum	AH_opac
H. patulum	AH_patu
H. petiolare	NH_peti
H. platypterum	AH_plat
H. polycladum	NH_poly
H. quinquenerve (H. nudifolium var. nudifolium)	AH_quin
H. reflexum	NH_refl
H. schlectri (nudifolium (L.) Less. var. nudifolium)	NH_schl
H. setosum	AH_seto
H. truncatum	AH_trun
H. wilmsii	AH_wilm
H. zeyheri	AH_zeyh
